# Supplementary material for: High Predatory Capacity of a Novel Arthrobotrys oligospora Variety on the Ovine Gastrointestinal Nematode Haemonchus contortus (Rhabditomorpha: Trichostrongylidae)
Source: MDPI journal article supplement (doi:10.3390/pathogens10070815), 2021-06-29
Supplement: s1 [file s1]

# Ranges

|   | Strain | Long (μm) | Septum (μm) | Basal Cell - Septum (μm) | Septum - Distal Cell (μm) |
|---|--------|-----------|-------------|--------------------------|---------------------------|
| 1 | A6     | 24.4-15.2 | 11.3-5.3    | 11.4-4.0                 | 15.3-8.4                  |
| 2 | A12    | 21.6-15.6 | 10.8-6.7    | 9.1-4.4                  | 14.7-9.5                  |
| 3 | A13    | 23.1-15.4 | 11.3-6.4    | 9.2-4.5                  | 14.4-8.6                  |
| 4 | R2-1   | 21.9-15.0 | 11.6-6.5    | 8.8-3.8                  | 14.6-9.1                  |
| 5 | R2-6   | 22.1-13.9 | 12.1-6.2    | 8.9-3.6                  | 13.9-7.3                  |
| 6 | R2-13  | 30.3-16.0 | 14.8-7.2    | 15.8-6.0                 | 16.3-8.3                  |
| 7 | R2-14  | 22.2-14.6 | 11.9-7.0    | 8.9-4.1                  | 15.1-8.4                  |

# Average

|   | Strain | Long (μm) | Septum (μm) | Basal Cell - Septum (μm) | Septum - Distal Cell (μm) |
|---|--------|-----------|-------------|--------------------------|---------------------------|
| 1 | A6     | 18.39     | 8.43        | 6.71                     | 11.68                     |
| 2 | A12    | 18.62     | 8.03        | 6.68                     | 11.94                     |
| 3 | A13    | 18.82     | 8.61        | 6.95                     | 11.87                     |
| 4 | R2-1   | 18.53     | 9.01        | 6.68                     | 11.85                     |
| 5 | R2-6   | 17.50     | 8.36        | 6.36                     | 11.14                     |
| 6 | R2-13  | 21.36     | 8.16        | 8.94                     | 12.42                     |
| 7 | R2-14  | 18.22     | 9.02        | 6.39                     | 11.84                     |

BC-S/S-DC

1.74

1.79

1.71

1.78

1.75

1.39

1.85
